# Supplementary material for: Phenotypic Trait Variation as a Response to Altitude-Related Constraints in Arabidopsis Populations
Source: Front Plant Sci. 2019 Apr 9;10:430. doi: 10.3389/fpls.2019.00430 (PMC6465555; doi:10.3389/fpls.2019.00430)
Supplement: TABLE S2 — Haplotype class information for each individual belonging to the different Pyrenean populations. [file Table_2.xlsx]

## Sheet: Information
Supporting information Table S2. Haplotype class information for each individual belonging to the different Pyrenean populations
Supporting information S2A. Haplotype class determined from the concatenated sequences
Supporting information S2B. STRUCTURE input
Supporting information S2C. 45S rRNA R haplotype classes

## Sheet: Table S2A
Supporting information S2A. Haplotype class determined from the concatenated sequences
Name of each individual associate to the haplotype class of the concatenated sequence.
Ind.	Classe
Ag	C209
Arag1	C145
Arag10	C233
Arag2	C138
Arag3	C26
Arag4	C177
Arag5	C66
Arag6	C169
Arag7	C56
Arag8	C189
Arag9	C121
Argu1	C140
Argu10	C65
Argu2	C168
Argu3	C140
Argu4	C25
Argu5	C129
Argu6	C135
Argu7	C140
Argu8	C53
Argu9	C65
Arr	C109
Bedo1	C142
Bedo10	C163
Bedo15	C163
Bedo2	C132
Bedo3	C163
Bedo4	C163
Bedo5	C163
Bedo6	C163
Bedo7	C152
Bedo8	C163
Bedo9	C127
Belc1	C157
Belc10	C222
Belc13	C194
Belc2	C234
Belc3	C51
Belc4	C91
Belc5	C205
Belc6	C160
Belc7	C214
Belc8	C182
Belc9	C60
Ber	C31
Bez	C203
Biel1	C184
Biel10	C27
Biel2	C210
Biel3	C106
Biel4	C165
Biel5	C193
Biel6	C43
Biel7	C29
Biel8	C99
Biel9	C165
Bier1	C2
Bier2	C92
Bier3	C136
Bier4	C136
Bier5	C117
Bier6	C8
Bier7	C55
Bier8	C136
Bis	C57
Bran1	C166
Bran10	C32
Bran15	C17
Bran2	C192
Bran3	C143
Bran4	C227
Bran5	C71
Bran6	C196
Bran7	C108
Bran8	C161
Bran9	C78
Camu1	C6
Camu10	C6
Camu11	C6
Camu12	C44
Camu14	C6
Camu2	C6
Camu3	C6
Camu4	C6
Camu5	C6
Camu6	C6
Camu7	C6
Camu8	C6
Camu9	C6
Cast1	C154
Cast11	C22
Cast12	C1
Cast13	C70
Cast14	C1
Cast15	C59
Cast2	C12
Cast3	C46
Cast4	C183
Cast5	C64
Chau1	C149
Chau10	C18
Chau2	C84
Chau3	C84
Chau4	C34
Chau5	C215
Chau6	C178
Chau7	C114
Chau9	C200
Coc	C223
Col	C188
Eaux1	C181
Eaux10	C181
Eaux11	C41
Eaux12	C97
Eaux2	C181
Eaux3	C207
Eaux4	C207
Eaux5	C45
Eaux6	C45
Eaux7	C128
Eaux8	C97
Eaux9	C97
Eget20	C111
Eget21	C141
Eget22	C141
Eget23	C141
Eget24	C111
Eget25	C111
Eget26	C111
Eget27	C69
Eget29	C170
Eget31	C111
Et	C230
Fos1	C30
Fos10	C206
Fos11	C206
Fos12	C112
Fos2	C94
Fos3	C94
Fos4	C155
Fos5	C77
Fos6	C206
Fos7	C7
Fos8	C94
Fos9	C5
Gava1	C110
Gava10	C110
Gava11	C110
Gava12	C110
Gava15	C110
Gava2	C110
Gava3	C110
Gava4	C110
Gava5	C110
Gava6	C110
Gava7	C110
Gava8	C110
Gava9	C201
Gedr1	C61
Gedr10	C95
Gedr11	C104
Gedr12	C229
Gedr13	C217
Gedr2	C217
Gedr3	C226
Gedr4	C40
Gedr5	C40
Gedr6	C217
Gedr7	C217
Gedr8	C204
Gedr9	C204
Grip1	C228
Grip10	C98
Grip11	C98
Grip12	C98
Grip15	C98
Grip2	C98
Grip3	C98
Grip4	C98
Grip5	C98
Grip6	C98
Grip7	C98
Grip8	C98
Grip9	C98
Guch1	C15
Guch10	C9
Guch11	C101
Guch12	C101
Guch2	C28
Guch3	C68
Guch4	C147
Guch5	C9
Guch6	C219
Guch7	C9
Guch8	C101
Guch9	C220
Hern1	C221
Hern10	C235
Hern2	C11
Hern3	C213
Hern4	C235
Hern5	C162
Hern6	C235
Hern7	C131
Hern8	C80
Hern9	C235
Herr1	C107
Herr10	C167
Herr11	C83
Herr12	C167
Herr2	C54
Herr3	C137
Herr5	C137
Herr6	C224
Herr7	C96
Herr8	C107
Herr9	C52
Hosp1	C36
Hosp10	C36
Hosp11	C36
Hosp12	C16
Hosp17	C36
Hosp2	C36
Hosp3	C36
Hosp4	C36
Hosp5	C36
Hosp6	C36
Hosp7	C36
Hosp9	C36
Iss	C134
Jaco1	C89
Jaco10	C150
Jaco11	C150
Jaco12	C150
Jaco15	C150
Jaco2	C89
Jaco3	C89
Jaco4	C89
Jaco5	C89
Jaco6	C89
Jaco7	C89
Jaco8	C89
Jaco9	C89
Lant1	C19
Lant10	C171
Lant12	C191
Lant13	C38
Lant2	C130
Lant3	C225
Lant4	C198
Lant7	C113
Lant8	C42
Lant9	C144
Lave1	C3
Lave10	C62
Lave12	C3
Lave13	C3
Lave14	C232
Lave15	C212
Lave2	C212
Lave3	C62
Lave4	C58
Lave6	C212
Lave8	C212
Lave9	C76
Lec	C14
Mari1	C156
Mari10	C124
Mari11	C202
Mari12	C82
Mari13	C116
Mari2	C23
Mari3	C90
Mari4	C176
Mari5	C37
Mari6	C236
Mari7	C236
Mari8	C236
Mere1	C237
Mere10	C115
Mere11	C115
Mere12	C115
Mere16	C115
Mere2	C187
Mere3	C122
Mere4	C48
Mere5	C115
Mere6	C231
Mere7	C67
Mere8	C35
Mere9	C35
Moa	C10
Mong1	C49
Mong10	C185
Mong11	C174
Mong12	C4
Mong13	C87
Mong2	C81
Mong3	C33
Mong4	C86
Mong5	C85
Mong6	C126
Mong7	C47
Mong8	C123
Mong9	C13
Mou	C216
Noz	C151
Orb	C153
Pal	C125
Pan	C158
Pont1	C72
Pont10	C72
Pont2	C72
Pont3	C72
Pont4	C159
Pont5	C72
Pont6	C72
Pont7	C72
Pont8	C72
Pont9	C72
Prad1	C75
Prad10	C75
Prad11	C146
Prad12	C146
Prad2	C75
Prad3	C75
Prad4	C75
Prad5	C75
Prad6	C186
Prad7	C195
Prad8	C195
Prad9	C75
Pyl	C24
Qui	C175
Ria	C199
Roch1	C105
Roch10	C105
Roch11	C105
Roch12	C105
Roch2	C105
Roch3	C105
Roch4	C105
Roch5	C79
Roch6	C105
Roch7	C105
Roch8	C105
Roch9	C105
Savi1	C139
Savi10	C197
Savi11	C173
Savi2	C119
Savi3	C103
Savi4	C63
Savi5	C218
Savi6	C93
Savi7	C21
Savi8	C20
Savi9	C73
Sha	C148
Tol	C88
Urdo10	C180
Urdo11	C120
Urdo12	C133
Urdo13	C208
Urdo2	C211
Urdo3	C172
Urdo4	C164
Urdo5	C50
Urdo6	C102
Urdo7	C190
Urdo8	C74
Urdo9	C118
Vdm	C39
Ved	C179
Vie	C100

## Sheet: Table S2B
Supporting information S2B. STRUCTURE input
Haplotype class of the 5 CIII Prx loci (AtPrx09, AtPrx25, AtPrx36, AtPrx48, AtPrx62) belonging to the 351 Pyrenean populations, the 22 populations of the 1,001 genomes and the ecotype Col and Sha used for the STRUCTURE software version 2.3.4.
Ind.	Prx09	Prx25	Prx36	Prx48	Prx62
Col	50	19	53	63	35
Sha	20	15	14	48	26
Ag	9	34	16	11	35
Arr	8	24	26	6	34
Ber	4	2	27	24	35
Bez	47	3	44	92	39
Bis	21	2	27	24	35
Coc	39	24	8	24	4
Et	36	24	5	92	10
Iss	15	24	38	24	45
Lec	48	27	4	6	44
Moa	21	2	18	24	16
Mou	21	24	53	67	3
Noz	57	24	41	92	12
Orb	23	34	17	24	35
Pal	27	22	36	40	16
Pan	51	2	52	24	35
Vdm	41	2	25	40	4
Ved	53	18	54	6	23
Vie	14	19	45	66	35
Pyl	18	2	38	18	4
Qui	30	19	53	92	35
Ria	8	2	27	24	16
Tol	51	2	35	8	35
Arag1	10	14	14	22	35
Arag10	10	14	33	22	19
Arag2	10	14	49	17	36
Arag3	10	14	14	38	1
Arag4	10	14	33	22	1
Arag5	10	11	47	22	20
Arag6	10	11	14	22	1
Arag7	10	14	10	22	1
Arag8	10	14	33	22	7
Arag9	10	11	14	22	7
Argu1	1	20	33	15	21
Argu10	21	31	33	43	21
Argu2	1	20	33	15	8
Argu3	1	20	33	15	21
Argu4	1	20	33	15	11
Argu5	21	31	33	15	21
Argu6	21	31	21	15	21
Argu7	1	20	33	15	21
Argu8	1	31	33	43	21
Argu9	21	31	33	43	21
Bedo1	1	14	31	5	21
Bedo10	1	14	31	10	21
Bedo15	1	14	31	10	21
Bedo2	1	14	31	69	21
Bedo3	1	14	31	10	21
Bedo4	1	14	31	10	21
Bedo5	1	14	31	10	21
Bedo6	1	14	31	10	21
Bedo7	1	2	31	58	21
Bedo8	1	14	31	10	21
Bedo9	1	2	31	10	21
Belc1	1	11	47	22	17
Belc10	1	14	48	22	21
Belc13	1	11	23	22	21
Belc2	1	11	13	93	2
Belc3	56	11	13	22	21
Belc4	1	11	13	22	17
Belc5	1	11	13	1	2
Belc6	1	11	48	70	2
Belc7	1	11	48	22	17
Belc8	56	5	15	22	21
Belc9	1	11	47	79	17
Biel1	54	9	1	22	21
Biel10	44	37	22	61	18
Biel2	12	9	29	77	21
Biel3	54	9	7	22	21
Biel4	54	9	31	22	21
Biel5	44	11	29	28	15
Biel6	44	11	29	28	17
Biel7	44	11	47	73	17
Biel8	54	9	47	28	21
Biel9	54	9	31	22	21
Bier1	5	11	29	55	22
Bier2	1	11	13	43	17
Bier3	25	11	13	43	21
Bier4	25	11	13	43	21
Bier5	5	11	29	53	32
Bier6	5	11	29	55	32
Bier7	44	4	13	15	43
Bier8	25	11	13	43	21
Bran1	47	37	31	83	17
Bran10	47	11	31	2	17
Bran15	47	11	31	81	17
Bran2	47	37	3	62	17
Bran3	47	37	9	83	17
Bran4	47	11	31	54	17
Bran5	47	11	28	47	17
Bran6	47	11	32	27	17
Bran7	47	11	31	45	17
Bran8	47	11	31	56	17
Bran9	47	11	31	51	17
Camu1	3	11	47	22	21
Camu10	3	11	47	22	21
Camu11	3	11	47	22	21
Camu12	1	11	31	39	21
Camu14	3	11	47	22	21
Camu2	3	11	47	22	21
Camu3	3	11	47	22	21
Camu4	3	11	47	22	21
Camu5	3	11	47	22	21
Camu6	3	11	47	22	21
Camu7	3	11	47	22	21
Camu8	3	11	47	22	21
Camu9	3	11	47	22	21
Cast1	35	11	13	55	16
Cast11	19	37	31	48	30
Cast12	47	11	31	48	30
Cast13	21	34	31	48	5
Cast14	47	11	31	48	30
Cast15	21	34	34	48	5
Cast2	1	11	13	23	16
Cast3	17	37	31	74	28
Cast4	17	16	31	83	16
Cast5	17	16	31	84	16
Chau1	1	11	33	19	21
Chau10	31	11	33	35	5
Chau2	1	11	33	19	2
Chau3	1	11	33	19	2
Chau4	4	11	11	25	2
Chau5	4	11	33	59	2
Chau6	1	11	42	68	21
Chau7	1	11	2	7	17
Chau9	45	11	33	35	5
Eaux1	44	34	34	10	21
Eaux10	44	34	34	10	21
Eaux11	21	28	34	10	21
Eaux12	21	34	34	10	21
Eaux2	44	34	34	10	21
Eaux3	44	11	34	10	21
Eaux4	44	11	34	10	21
Eaux5	40	34	34	10	21
Eaux6	40	34	34	10	21
Eaux7	40	11	34	10	21
Eaux8	21	34	34	10	21
Eaux9	21	34	34	10	21
Eget20	52	36	47	92	11
Eget21	52	36	50	91	11
Eget22	52	36	50	91	11
Eget23	52	36	50	91	11
Eget24	52	36	47	92	11
Eget25	52	36	47	92	11
Eget26	52	36	47	92	11
Eget27	49	36	47	92	11
Eget29	46	36	47	92	11
Eget31	52	36	47	92	11
Fos1	2	11	42	22	21
Fos10	1	11	42	22	21
Fos11	1	11	42	22	21
Fos12	1	11	42	17	21
Fos2	54	11	34	32	21
Fos3	54	11	34	32	21
Fos4	1	11	42	37	21
Fos5	1	11	43	43	21
Fos6	1	11	42	22	21
Fos7	54	11	42	49	21
Fos8	54	11	34	32	21
Fos9	1	11	42	34	21
Gava1	50	32	14	44	29
Gava10	50	32	14	44	29
Gava11	50	32	14	44	29
Gava12	50	32	14	44	29
Gava15	50	32	14	44	29
Gava2	50	32	14	44	29
Gava3	50	32	14	44	29
Gava4	50	32	14	44	29
Gava5	50	32	14	44	29
Gava6	50	32	14	44	29
Gava7	50	32	14	44	29
Gava8	50	32	14	44	29
Gava9	50	38	14	44	29
Gedr1	1	24	47	33	9
Gedr10	16	24	31	33	35
Gedr11	1	11	31	52	35
Gedr12	1	11	31	52	38
Gedr13	22	11	31	52	35
Gedr2	22	11	31	52	35
Gedr3	1	19	47	33	21
Gedr4	5	11	31	33	21
Gedr5	5	11	31	33	21
Gedr6	22	11	31	52	35
Gedr7	22	11	31	52	35
Gedr8	1	11	31	52	21
Gedr9	1	11	31	52	21
Grip1	1	11	31	50	17
Grip10	1	11	31	33	17
Grip11	1	11	31	33	17
Grip12	1	11	31	33	17
Grip15	1	11	31	33	17
Grip2	1	11	31	33	17
Grip3	1	11	31	33	17
Grip4	1	11	31	33	17
Grip5	1	11	31	33	17
Grip6	1	11	31	33	17
Grip7	1	11	31	33	17
Grip8	1	11	31	33	17
Grip9	1	11	31	33	17
Guch1	6	1	48	43	41
Guch10	1	11	48	43	11
Guch11	1	7	48	43	11
Guch12	1	7	48	43	11
Guch2	1	1	48	43	11
Guch3	33	7	48	43	11
Guch4	34	2	48	43	11
Guch5	1	11	48	43	11
Guch6	1	2	48	43	11
Guch7	1	11	48	43	11
Guch8	1	7	48	43	11
Guch9	32	7	48	43	11
Hern1	58	2	19	22	35
Hern10	44	2	19	22	35
Hern2	58	2	46	22	35
Hern3	44	2	46	22	35
Hern4	44	2	19	22	35
Hern5	44	2	19	22	42
Hern6	44	2	19	22	35
Hern7	44	2	13	22	35
Hern8	44	2	13	22	42
Hern9	44	2	19	22	35
Herr1	1	27	31	22	35
Herr10	1	27	31	83	35
Herr11	1	29	31	83	35
Herr12	1	27	31	83	35
Herr2	54	27	31	22	14
Herr3	54	23	31	22	35
Herr5	54	23	31	22	35
Herr6	54	27	31	22	35
Herr7	1	23	31	22	35
Herr8	1	27	31	22	35
Herr9	54	11	14	22	35
Hosp1	44	19	14	22	44
Hosp10	44	19	14	22	44
Hosp11	44	19	14	22	44
Hosp12	44	19	14	22	33
Hosp17	44	19	14	22	44
Hosp2	44	19	14	22	44
Hosp3	44	19	14	22	44
Hosp4	44	19	14	22	44
Hosp5	44	19	14	22	44
Hosp6	44	19	14	22	44
Hosp7	44	19	14	22	44
Hosp9	44	19	14	22	44
Jaco1	1	11	31	22	21
Jaco10	1	11	13	22	21
Jaco11	1	11	13	22	21
Jaco12	1	11	13	22	21
Jaco15	1	11	13	22	21
Jaco2	1	11	31	22	21
Jaco3	1	11	31	22	21
Jaco4	1	11	31	22	21
Jaco5	1	11	31	22	21
Jaco6	1	11	31	22	21
Jaco7	1	11	31	22	21
Jaco8	1	11	31	22	21
Jaco9	1	11	31	22	21
Lant1	52	6	39	24	5
Lant10	13	6	39	85	5
Lant12	38	2	37	85	32
Lant13	52	2	39	21	44
Lant2	52	6	12	46	5
Lant3	27	6	12	72	31
Lant4	7	33	47	3	37
Lant7	27	11	47	89	5
Lant8	42	6	14	76	32
Lant9	52	11	47	71	5
Lave1	10	13	30	43	24
Lave10	1	11	30	43	2
Lave12	10	13	30	43	24
Lave13	10	13	30	43	24
Lave14	3	19	40	22	24
Lave15	10	4	30	43	24
Lave2	10	4	30	43	24
Lave3	1	11	30	43	2
Lave4	1	4	30	43	2
Lave6	10	4	30	43	24
Lave8	10	4	30	43	24
Lave9	10	11	30	43	2
Mari1	19	17	51	83	17
Mari10	17	34	31	60	17
Mari11	24	34	31	83	11
Mari12	11	34	47	43	17
Mari13	11	34	47	29	17
Mari2	4	4	14	13	17
Mari3	4	34	31	87	17
Mari4	17	34	31	87	17
Mari5	17	17	31	83	11
Mari6	17	34	31	83	11
Mari7	17	34	31	83	11
Mari8	17	34	31	83	11
Mere1	1	19	47	22	21
Mere10	1	19	13	22	21
Mere11	1	19	13	22	21
Mere12	1	19	13	22	21
Mere16	1	19	13	22	21
Mere2	1	19	47	12	21
Mere3	1	19	31	22	21
Mere4	1	37	31	22	21
Mere5	1	19	13	22	21
Mere6	1	19	13	22	6
Mere7	1	10	13	22	6
Mere8	1	19	13	22	40
Mere9	1	19	13	22	40
Mong1	54	25	14	41	17
Mong10	28	25	14	64	21
Mong11	1	25	31	57	2
Mong12	50	32	31	88	11
Mong13	50	19	31	80	27
Mong2	3	21	47	31	35
Mong3	3	8	20	75	24
Mong4	44	39	31	26	35
Mong5	1	8	42	16	24
Mong6	54	8	42	9	17
Mong7	1	12	34	36	21
Mong8	1	11	47	36	25
Mong9	3	32	47	36	11
Pont1	50	32	31	91	35
Pont10	50	32	31	91	35
Pont2	50	32	31	91	35
Pont3	50	32	31	91	35
Pont4	29	32	31	91	35
Pont5	50	32	31	91	35
Pont6	50	32	31	91	35
Pont7	50	32	31	91	35
Pont8	50	32	31	91	35
Pont9	50	32	31	91	35
Prad1	24	11	47	22	25
Prad10	24	11	47	22	25
Prad11	24	11	24	22	25
Prad12	24	11	24	22	25
Prad2	24	11	47	22	25
Prad3	24	11	47	22	25
Prad4	24	11	47	22	25
Prad5	24	11	47	22	25
Prad6	24	30	47	22	25
Prad7	24	11	47	22	13
Prad8	24	11	47	22	13
Prad9	24	11	47	22	25
Roch1	1	11	31	83	11
Roch10	1	11	31	83	11
Roch11	1	11	31	83	11
Roch12	1	11	31	83	11
Roch2	1	11	31	83	11
Roch3	1	11	31	83	11
Roch4	1	11	31	83	11
Roch5	1	30	31	83	11
Roch6	1	11	31	83	11
Roch7	1	11	31	83	11
Roch8	1	11	31	83	11
Roch9	1	11	31	83	11
Savi1	37	11	47	22	21
Savi10	1	11	6	65	17
Savi11	44	11	6	83	17
Savi2	10	11	47	22	21
Savi3	1	11	6	43	21
Savi4	1	35	29	86	40
Savi5	1	26	31	43	40
Savi6	1	11	29	4	40
Savi7	1	11	29	20	40
Savi8	1	11	29	43	17
Savi9	55	11	6	43	17
Urdo10	10	11	47	90	21
Urdo11	43	11	34	43	11
Urdo12	1	32	29	42	25
Urdo13	21	32	29	43	17
Urdo2	3	11	34	90	21
Urdo3	3	11	47	90	24
Urdo4	44	11	31	90	17
Urdo5	50	11	31	78	21
Urdo6	1	11	31	30	25
Urdo7	1	11	34	14	11
Urdo8	26	11	34	82	11
Urdo9	10	11	34	84	11
Maximum	58	39	54	93	45

## Sheet: Table S2C
Supporting information S2C. 45S rRNA R haplotype classes
R haplotype classes were defined based on the presence of the variants 1, 2 and 3 and also on the abundnace of each variant
Ind.	3'ETS 45S rDNA	Haplotype CIII Prx
Camu1	R1 var1	C6
Camu2	R1 var1	C6
Camu3	R1 var1	C6
Camu4	R1 var1	C6
Camu5	R1 var1	C6
Camu6	R1 var1	C6
Camu7	R1 var1	C6
Camu8	R1 var1	C6
Camu9	R1 var1	C6
Camu10	R1 var1	C6
Camu11	R1 var1	C6
Camu12	R5.3 var1+VAR3	C44
Camu14	R1 var1	C6
Gava1	nd	C110
Gava2	R1 var1	C110
Gava3	R1 var1	C110
Gava4	nd	C110
Gava5	R1 var1	C110
Gava6	R1 var1	C110
Gava7	R1 var1	C110
Gava8	R1 var1	C110
Gava9	nd	C201
Gava10	R1 var1	C110
Gava11	R1 var1	C110
Gava12	R1 var1	C110
Gava15	R1 var1	C110
Grip1	R5.2 VAR1 + var3	C228
Grip2	R5.2 VAR1 + var3	C98
Grip3	R5.2 VAR1 + var3	C98
Grip4	R5.2 VAR1 + var3	C98
Grip5	R5.2 VAR1 + var3	C98
Grip6	R5.2 VAR1 + var3	C98
Grip7	R5.2 VAR1 + var3	C98
Grip8	R5.2 VAR1 + var3	C98
Grip9	R5.2 VAR1 + var3	C98
Grip10	R5.2 VAR1 + var3	C98
Grip11	R5.2 VAR1 + var3	C98
Grip12	R5.2 VAR1 + var3	C98
Grip15	R5.2 VAR1 + var3	C98
Hern1	R5.1 var1+var3	C221
Hern2	R5.1 var1+var3	C11
Hern3	R5.1 var1+var3	C213
Hern4	R5.1 var1+var3	C235
Hern5	R5.1 var1+var3	C162
Hern6	R5.1 var1+var3	C235
Hern7	R5.1 var1+var3	C131
Hern8	R5.1 var1+var3	C80
Hern9	R5.1 var1+var3	C235
Hern10	R5.1 var1+var3	C235
Hosp1	nd	C36
Hosp2	R6 VAR2+var3	C36
Hosp3	R6 VAR2+var3	C36
Hosp4	nd	C36
Hosp5	R6 VAR2+var3	C36
Hosp6	R6 VAR2+var3	C36
Hosp7	R6 VAR2+var3	C36
Hosp9	R6 VAR2+var3	C36
Hosp10	R6 VAR2+var3	C36
Hosp11	nd	C36
Hosp12	R6 VAR2+var3	C16
Hosp17	R5.2 VAR1+var3	C36
Jaco1	R7 var1+var2+var3	C89
Jaco2	R7 var1+var2+var3	C89
Jaco3	R7 var1+var2+var3	C89
Jaco4	R7 var1+var2+var3	C89
Jaco5	R7 var1+var2+var3	C89
Jaco6	R7 var1+var2+var3	C89
Jaco7	R7 var1+var2+var3	C89
Jaco8	R7 var1+var2+var3	C89
Jaco9	R7 var1+var2+var3	C89
Jaco10	R1 var1	C150
Jaco11	nd	C150
Jaco12	R7 var1+var2+var3	C150
Jaco15	R7 var1+var2+var3	C150
Pont1	R5.2 VAR1 + var3	C72
Pont2	R5.2 VAR1 + var3	C72
Pont3	R5.2 VAR1 + var3	C72
Pont4	R5.2 VAR1 + var3	C159
Pont5	R5.2 VAR1 + var3	C72
Pont6	R5.2 VAR1 + var3	C72
Pont7	R5.2 VAR1 + var3	C72
Pont8	R5.2 VAR1 + var3	C72
Pont9	R5.2 VAR1 + var3	C72
Pont10	R5.2 VAR1 + var3	C72
Prad1	nd	C75
Prad2	nd	C75
Prad3	R1 var1	C75
Prad4	R1 var1	C75
Prad5	R1 var1	C75
Prad6	R1 var1	C186
Prad7	R1 var1	C195
Prad8	nd	C195
Prad9	nd	C75
Prad10	R1 var1	C75
Prad11	nd	C146
Prad12	R1 var1	C146
Roch1	R5.2 VAR1 + var3	C105
Roch2	R5.2 VAR1 + var3	C105
Roch3	R5.2 VAR1 + var3	C105
Roch4	R5.2 VAR1 + var3	C105
Roch5	nd	C79
Roch6	R5.2 VAR1 + var3	C105
Roch7	R5.2 VAR1 + var3	C105
Roch8	nd	C105
Roch9	nd	C105
Roch10	R5.2 VAR1 + var3	C105
Roch11	nd	C105
Roch12	R5.2 VAR1 + var3	C105
Lant1	R1 var1	C19
Lant2	R1 var1	C130
Lant3	R1 var1	C225
Lant4	R5.1 var1+var3	C198
Lant7	R1 var1	C113
Lant8	R5.1 var1+var3	C42
Lant9	R1 var1	C144
Lant10	R1 var1	C171
Lant12	R5.2 var1+var3	C191
Lant13	R1 var1	C38
